# Supplementary material for: A non-invasive approach to explore the discriminatory potential of the urinary volatilome of invasive ductal carcinoma of the breast
Source: Royal Society of Chemistry journal article supplement (doi:10.1039/c8ra02083c), 2018-01-01

**Supplementary Table S1:** The clinical and demographic information of the IDC subjects and healthy controls.

| <b>Characteristics</b>                    | <b>IDC<br/>(Discovery cohort / External cohort)</b> | <b>Healthy control<br/>(Discovery cohort / External cohort)</b> |
|-------------------------------------------|-----------------------------------------------------|-----------------------------------------------------------------|
| Biological Specimen                       | Urine                                               | Urine                                                           |
| Number of participants<br>(male / female) | 65 (0,65) / 32 (0, 32)                              | 70 (0,70) / 27 (0,27)                                           |
| Age, median (range)                       | 54 ± 8 (27-80) /                                    | 50 ± 10 (25-74) /                                               |
| Eastern India residence                   | 12 / 7                                              | 6 / 6                                                           |
| Western India residence                   | 32 / 12                                             | 25 / 9                                                          |
| Northern India residence                  | 15 / 5                                              | 21 / 8                                                          |
| Southern India residence                  | 6 / 8                                               | 18 / 4                                                          |
| BC type Luminal A                         | 19 / 7                                              | N.A. / N.A.                                                     |
| BC type Luminal B                         | 28 / 12                                             | N.A. N.A.                                                       |
| BC type HER2 Enriched                     | 13 / 11                                             | N.A. / N.A.                                                     |
| BC type Basal                             | 5 / 2                                               | N.A. / N.A.                                                     |
| Diet (Veg/Non-Veg)                        | (27 / 38) / (18 / 14)                               | (36 / 34) / (17 / 10)                                           |

**Supplementary Table S2.** The most significantly altered pathways observed in IDC which evolved from the MetPA analysis.

| <b>Sr. No.</b> | <b>Pathway name</b>                | <b>Hits (FC)</b>                                 | <b>p-value</b> | <b>FDR</b> |
|----------------|------------------------------------|--------------------------------------------------|----------------|------------|
| 1              | Pyruvate metabolism                | Acetic acid (0.896918)                           | 0.006421       | 0.011558   |
| 2              | Sulfur metabolism                  | Acetic acid (0.896918)                           | 0.006421       | 0.011558   |
| 3              | Selenoamino acid metabolism        | Acetic acid (0.896918)                           | 0.006421       | 0.011558   |
| 4              | Glycolysis or Gluconeogenesis      | Acetic acid (0.896918)                           | 0.006421       | 0.011558   |
| 5              | Taurine and hypotaurine metabolism | Acetic acid (0.896918)                           | 0.006421       | 0.011558   |
| 6              | Tyrosine metabolism                | Phenol (0.830554)                                | 0.042958       | 0.064437   |
| 7              | Fatty acid biosynthesis            | Dodecanoic acid (0.668212), n-Decanoic acid (NA) | 0.1037         | 0.1126     |

**Supplementary Table S3.** The list of all the VOCs identified in IDC subjects and healthy controls.

**Supplementary Fig. S1.** Data normalization in Metaboanalyst 3.0 where the dataset was quantile normalized, cube root transformed and range scaled after missing value imputation via Bayesian PCA algorithm.

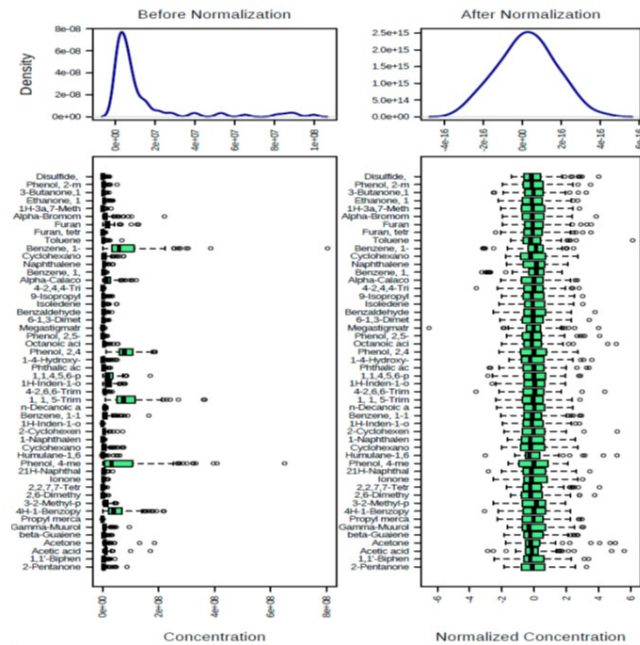

Supplement: c8ra02083c1.pdf [file c8ra02083c1.pdf]
