# Supplementary material for: A non-invasive approach to explore the discriminatory potential of the urinary volatilome of invasive ductal carcinoma of the breast
Source: RSC Adv. 2018 Jul 12;8(44):25040–50. doi: 10.1039/c8ra02083c (PMC9082450; doi:10.1039/c8ra02083c)
Supplement: RA-008-C8RA02083C-s002 [file RA-008-C8RA02083C-s002.xlsx]

## Sheet: Sheet1
	Supplementary Table S3: The list of all the VOCs identified in IDC subjects and healthy controls
Sr. No.	Volatile Organic Compounds	Retention Time
1	Furan	5.541
2	Acetone	5.819
3	Propyl mercaptan	6.061
4	Furan, 2-methyl-	6.42
5	Thiirane, methyl-	6.731
6	2-Pentanone	9.241
7	Toluene	11.693
8	4[h]-Pyridone, 1-benzyl-3,5-dichloro-2,6-dimethyl-	11.801
9	Disulfide, dimethyl	13.294
10	4-Heptanone	15.851
11	Disulfide, methyl propyl	22.032
12	Furan, tetrahydro-2,2-dimethyl-5-(1-methyl-1-propenyl)-	22.251
13	Thiophene, 2,4-dimethyl-	23.574
14	Benzene, 1-methyl-2-(1-methylethyl)-	23.748
15	Disulfide, methyl 2-propenyl	24.921
16	Benzene, 1,2,3-trimethyl-	28.285
17	Benzene, 1,2,4-trimethyl-	28.831
18	2-Methyl-3-(methylthio) furan	29.932
19	Dimethyl trisulfide	31.423
20	Furan, 2-methyl-5-(methylthio)-	31.923
21	(1,4-Dimethylpent-2-enyl)benzene	34.296
22	Benzene, 1-methyl-4-(1-methylethenyl)-	35.201
23	Naphthalene, 1,2,3,4-tetrahydro-1,1,6-trimethyl-	35.822
24	Acetic acid	37.672
25	Furfural	37.904
26	Benzene, 1,2,4,5-tetramethyl-	38.225
27	1-Hexanol, 2-ethyl-	39.33
28	Ethanone, 1-(2-furanyl)-	40.366
29	Ionone	40.804
30	2(1H)-Naphthalenone, 3,4,4a,5,6,7-hexahydro-1,1,4a-trimethyl-	40.997
31	1H-3a,7-Methanoazulene, 2,3,4,7,8,8a-hexahydro-3,6,8,8-tetramethyl-, [3R-(3?,3a?,7?,8a?)]-	42.464
32	2-Furancarboxaldehyde, 5-methyl-	44.478
33	Ylangene	46.71
34	Ledene oxide-(II)	47.478
35	Cyclohexanol, 5-methyl-2-(1-methylethyl)-, (1?,2?,5?)-	48.184
36	Cyclohexanol, 1-methyl-4-(1-methylethyl)-	48.256
37	beta-Guaiene	48.407
38	Isoledene	49.224
39	2-Cyclohexen-1-one, 2-methyl-5-(1-methylethyl)-, (S)-	50.188
40	Naphthalene, 1,2,4a,5,8,8a-hexahydro-4,7-dimethyl-1-(1-methylethyl)-, (1?,4a?,8a?)	50.763
41	alpha-Muurolene	51.535
42	beta-Vatirenene	51.695
43	1H-Cycloprop[e]azulen-7-ol, decahydro-1,1,7-trimethyl-4-methylene-, [1ar-(1a?,4a?,7?,7a?,7b?)]-	52.172
44	1-Cyclohexene-1-carboxaldehyde, 4-(1-methylethyl)-	52.339
45	1H-Inden-1-one, 2,3-dihydro-3,3,5,6-tetramethyl-	53.287
46	1, 1, 5-Trimethyl-1, 2-dihydronaphthalene	53.633
47	4,4-Dimethyl-3-(3-methylbut-3-enylidene)-2-methylenebicyclo[4.1.0]heptane	53.849
48	2,6-Dimethyl-10-methylene-12-oxatricyclo[7.3.1.0(1,6)]tridec-2-ene	54.173
49	Benzene, 1-(1,5-dimethyl-4-hexenyl)-4-methyl-	55.346
50	Ethanone, 1-(3-methylphenyl)-	55.647
51	Benzaldehyde, 4-(1-methylethyl)-	55.944
52	2,4,6-Trimethylbenzyl alcohol	56.415
53	9-Isopropyl-1-methyl-2-methylene-5-oxatricyclo[5.4.0.0(3,8)]undecane	57.556
54	2-Butanone, 4-(2,6,6-trimethyl-2-cyclohexen-1-yl)-	58.017
55	2-Buten-1-one, 1-(2,6,6-trimethyl-1,3-cyclohexadien-1-yl)-, (E)-	58.102
56	Naphthalene, 1,2,3,4-tetrahydro-1,6-dimethyl-4-(1-methylethyl)-, (1S-cis)-	58.308
57	Phenol, 2-methoxy-	60.916
58	9-Methyl-S-octahydroanthracene	61.155
59	Alpha-Bromomesitylene	61.449
60	Alpha-Calacorene	63.639
61	4-(2,4,4-Trimethyl-cyclohexa-1,5-dienyl)-but-3-en-2-one	65.727
62	4-(2,6,6-Trimethylcyclohexa-1,3-dienyl)but-3-en-2-one	69.699
63	1-Dodecyn-4-ol	70.088
64	Phenol	70.382
65	Naphthalene, 1,2-dihydro-1,4,6-trimethyl-	70.892
66	Humulane-1,6-dien-3-ol	70.997
67	Isolongifolene, 4,5,9,10-dehydro-	71.487
68	6-(1,3-Dimethyl-buta-1,3-dienyl)-1,5,5-trimethyl-7-oxa-bicyclo[4.1.0]hept-2-ene	71.506
69	Octanoic acid	71.781
70	1H-Cyclopropa[a]naphthalene, 1a,2,3,5,6,7,7a,7b-octahydro-1,1,7,7a-tetramethyl-, [1aR-(1a?,7?,7a?,7b?)]-	72.069
71	Gamma-Muurolene	72.078
72	Phenol, 4-methyl-	72.314
73	Phenol, 3-methyl-	72.497
74	4H-1-Benzopyran, 4,4,5,8-tetramethyl-	72.749
75	7-Oxabicyclo[4.1.0]heptane, 2,2,6-trimethyl-1-(3-methyl-1,3-butadienyl)-5-methylene-	73.046
76	1-Naphthalenol, decahydro-1,4a-dimethyl-7-(1-methylethylidene)-, [1R-(1?,4a?,8a?)]-	73.147
77	2,2,7,7-Tetramethyltricyclo[6.2.1.0(1,6)]undec-4-en-3-one	73.229
78	3-(2-Methyl-propenyl)-1H-indene	73.984
79	1,1'-Biphenyl, 4-(1-methylethyl)-	74.249
80	Phenol, 2-methyl-5-(1-methylethyl)-	74.383
81	Megastigmatrienone	74.582
82	Phenol, 2,5-dichloro-	74.648
83	2,4a-Methanonaphthalen-7(4aH)-one, 1,2,3,4,5,6-hexahydro-1,1,5,5-tetramethyl-, (2s-cis)-	75.125
84	3-Butanone,1-(2,3,6-trimethylphenyl)-	75.331
85	Naphthalene, 1,6-dimethyl-4-(1-methylethyl)-	75.452
86	Ar-tumerone	75.726
87	1H-Inden-1-one, 2,3-dihydro-3,3,4,5-tetramethyl-	76
88	n-Decanoic acid	76.099
89	1,1,4,5,6-pentamethyl-2,3-dihydro-1H-indene	76.753
90	Phenol, 2,4-bis(1,1-dimethylethyl)-	76.923
91	Cyclobutane, tetrakis(1-methylethylidene)-	78.809
92	1-(4-Hydroxy-3,5-di-tert.-butylphenyl)-2-methyl-3-morpholinopropan-1-one	78.998
93	Dodecanoic acid	81.067
94	Phthalic acid, hex-3-yl isobutyl ester	82.973
